# Supplementary material for: Evaluation of 11 years of newborn screening for maple syrup urine disease in the Netherlands and a systematic review of the literature: Strategies for optimization
Source: PubMed Central journal article supplement (PMC7358668; doi:10.1002/jmd2.12124), 2020-05-13
Supplement: JMD2-54-68-s004.pdf [file JMD2-54-68-s004.pdf]

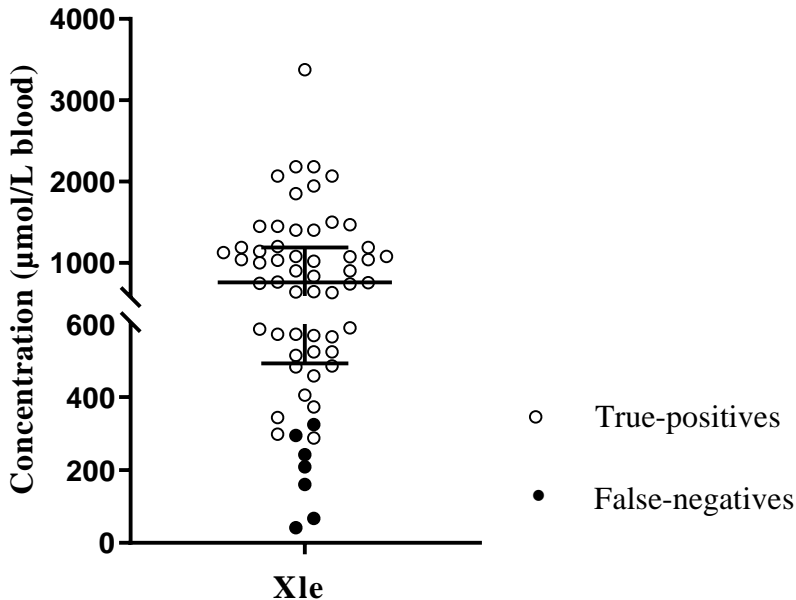

**Figure S3** Total leucine (Xle) concentrations (median and IQR) measured in MSMS NBS in MSUD patients, including both true-positive and false-negative literature results
